# Supplementary material for: A productive clash of perspectives? The interplay between articles’ and authors’ perspectives and their impact on Wikipedia edits in a controversial domain
Source: PLOS journal article supplement (doi:10.1371/journal.pone.0178985), 2017-06-02
Supplement: S4 (10.1371/journal.pone.0178985.s004) [file journal.pone.0178985.s004]

**S4 Table. Regression of articles' imbalance on the relevant predictors and on the two-way, three-way, and four-way interaction terms.**

| Regression parameter               | Estimate | SE   | t-value | p-value | Sign. |
|------------------------------------|----------|------|---------|---------|-------|
| Intercept                          | 0.09     | 0.01 | 9.46    | < .001  | ***   |
| Direction of polarity (IV0)        | -0.03    | 0.02 | -1.72   | .089    | ns    |
| Number of authors (IV1)            | 0.00     | 0.00 | 0.74    | .462    | ns    |
| Incongruity (IV2)                  | 0.84     | 0.25 | 3.40    | .001    | **    |
| Authors' heterogeneity (IV3)       | -0.56    | 0.28 | -2.04   | .045    | *     |
| Interaction: IV0 × IV1             | -0.01    | 0.00 | -2.24   | .028    | *     |
| Interaction: IV0 × IV2             | -0.63    | 0.49 | -1.29   | .201    | ns    |
| Interaction: IV0 × IV3             | 0.80     | 0.43 | 1.84    | .069    | ns    |
| Interaction: IV1 × IV2             | -0.01    | 0.03 | -0.54   | .590    | ns    |
| Interaction: IV1 × IV3             | 0.02     | 0.04 | 0.54    | .590    | ns    |
| Interaction: IV2 × IV3             | 1.31     | 2.96 | 0.44    | .659    | ns    |
| Interaction: IV1 × IV2 × IV3       | -0.09    | 0.39 | -0.23   | .819    | ns    |
| Interaction: IV0 × IV2 × IV3       | 3.27     | 8.61 | 0.38    | .705    | ns    |
| Interaction: IV0 × IV1 × IV3       | -0.04    | 0.08 | -0.46   | .644    | ns    |
| Interaction: IV0 × IV1 × IV2       | 0.04     | 0.07 | 0.66    | .510    | ns    |
| Interaction: IV0 × IV1 × IV2 × IV3 | 1.10     | 1.22 | 0.90    | .370    | ns    |

*Note.*  $R^2$  values before and after the four-way interaction term was dropped from the quasi-saturated model: .23 and .23,  $F(1, 82) = 0.81$ ,  $p = .370$ .  $R^2$  values before and after the four three-way interaction terms were dropped from the model which also contains all possible lower-order terms: .23 and .22,  $F(4, 83) = 0.14$ ,  $p = .969$ .  $R^2$  values before and after the six two-way interaction terms were dropped from the model which also contains the main effects: .22 and .14,  $F(6, 87) = 1.51$ ,  $p = .185$ .

\*  $p < .05$ , two-tailed. \*\*  $p < .01$ , two-tailed. \*\*\*  $p < .001$ , two-tailed. ns = not significant.
